# Supplementary material for: LINC00852 Promotes Lung Adenocarcinoma Spinal Metastasis by Targeting S100A9
Source: PubMed Central journal article supplement — J Cancer. 2018 Oct 18;9(22):4139–49. doi: 10.7150/jca.26897 (PMC6277606; doi:10.7150/jca.26897), 2018-10-18

1 Table S1. the primer sequences for lnc-HDAC9-8:2, lnc-GNB2L1-3:1,  
2 ENST00000609212 and lnc-NETO1-3:1.

| Name                    | Sequence (5'-3')              |
|-------------------------|-------------------------------|
| lnc-HDAC9-8:2 Forward   | 5'- GCTGATTGGCACGACCTCTT -3'  |
| lnc-HDAC9-8:2 Reverse   | 5'- CACCATCCTCACACCTCTGC -3'  |
| lnc-GNB2L1-3:1 Forward  | 5'- CCTTCAGAGTCACCTCGCAGT -3' |
| lnc-GNB2L1-3:1 Reverse  | 5'- ACCGGAACACCTCACAGTCC -3'  |
| lnc-NETO1-3:1 Forward   | 5'- AAGCCATGACTAAGGAGCCCA -3' |
| lnc-NETO1-3:1 Reverse   | 5'- TTCCGCTGAGGCATTGAAGG -3'  |
| ENST00000609212 Forward | 5'- TCCAGGAGGAGGACTGGAAG -3'  |
| ENST00000609212 Reverse | 5'- GCCATTGAGAGTCCACAGACA -3' |

3

Table S2. Mass spectrometry analysis of RNA pull down filtered.

| Protein Group | Protein ID | Accession            | -10kP  | Coverage (%) | Coverage (%) | Area Sample | #Peptides | #Unique | #Spec Sample | PTM           | Avg. Mass                                                                        | Description                                                                                                       |
|---------------|------------|----------------------|--------|--------------|--------------|-------------|-----------|---------|--------------|---------------|----------------------------------------------------------------------------------|-------------------------------------------------------------------------------------------------------------------|
|               | 84         | 150 sp Q 7KZ4 S      | 156.44 | 12           | 12           | 3.64E+06    | 10        | 10      | 10           | 13            | 101997                                                                           | Staphylococcal nuclease domain-containing protein 1 O S=Hom o sapiens GN=SND1 PE=1 SV=1                           |
|               | 53         | 217 sp P06702 S      | 154.48 | 39           | 39           | 3.77E+07    | 5         | 5       | 5            | 25            | Oxidation M                                                                      | 13242 Protein S100-A9 O S=Hom o sapiens GN=S100A9 PE=1 SV=1                                                       |
|               | 127        | 1033 H 3BRU 6 H 3B   | 119    | 21           | 21           | 1.61E+06    | 5         | 2       | 11           | Carbamitom    | 31719 Poly(GC)-binding protein 2 (Fragment) O S=Hom o sapiens GN=PCBP2 PE=1 SV=1 |                                                                                                                   |
|               | 127        | 1034 F8VZX2 F8VZ     | 119    | 20           | 20           | 1.61E+06    | 5         | 2       | 11           | Carbamitom    | 33800 Poly(GC)-binding protein 2 O S=Hom o sapiens GN=PCBP2 PE=1 SV=1            |                                                                                                                   |
|               | 127        | 1035 sp Q 15366 P    | 119    | 17           | 17           | 1.61E+06    | 5         | 2       | 11           | Carbamitom    | 38580 Poly(GC)-binding protein 2 O S=Hom o sapiens GN=PCBP2 PE=1 SV=1            |                                                                                                                   |
|               | 128        | 3129 sp Q 15365 P    | 117.03 | 18           | 18           | 1.95E+06    | 5         | 2       | 11           | Carbamitom    | 37498 Poly(GC)-binding protein 1 O S=Hom o sapiens GN=PCBP1 PE=1 SV=2            |                                                                                                                   |
|               | 151        | 1355 A0A0D9SF54      | 108.98 | 2            | 2            | 9.31E+05    | 5         | 5       | 5            | 5             | 282835                                                                           | Spectrin alpha chain non-erythrocytic 1 O S=Hom o sapiens GN=SPTAN1 PE=1 SV=1                                     |
|               | 151        | 1356 sp Q 13813 S    | 108.98 | 2            | 2            | 9.31E+05    | 5         | 5       | 5            | 5             | 284538                                                                           | Spectrin alpha chain non-erythrocytic 1 O S=Hom o sapiens GN=SPTAN1 PE=1 SV=3                                     |
|               | 151        | 1357 A0A0D9SG F6     | 108.98 | 2            | 2            | 9.31E+05    | 5         | 5       | 5            | 5             | 287604                                                                           | Spectrin alpha chain non-erythrocytic 1 O S=Hom o sapiens GN=SPTAN1 PE=1 SV=1                                     |
|               | 269        | 109 sp Q 02413 D     | 94.19  | 3            | 3            | 9.08E+05    | 2         | 2       | 3            | Oxidation M   | 113748 Desmoglein-1 O S=Hom o sapiens GN=DSG1 PE=1 SV=2                          |                                                                                                                   |
|               | 330        | 23740 sp Q 96PZ0 P   | 90.2   | 5            | 5            | 5.73E+05    | 3         | 3       | 3            | 3             | 75035                                                                            | Pseudouridylylase synthase 7 homolog O S=Hom o sapiens GN=PU57 PE=1 SV=2                                          |
|               | 231        | 304 sp Q 08554 D     | 89.59  | 3            | 3            | 9.30E+05    | 2         | 2       | 2            | 3             | 99987                                                                            | Desmoglein-1 O S=Hom o sapiens GN=DSG1 PE=1 SV=2                                                                  |
|               | 337        | 29189 sp Q 87C J2 S  | 87.83  | 3            | 3            | 4.67E+05    | 2         | 2       | 3            | 3             | 93674                                                                            | Dolichyl-diphosphooligosaccharide--protein glycosyltransferase subunit STT3B O S=Hom o sapiens GN=STT3B PE=1 SV=1 |
|               | 179        | 830 M OQ X5S M O     | 86.57  | 5            | 5            | 1.80E+06    | 3         | 3       | 5            | 5             | 58481                                                                            | Heterogeneous nuclear ribonucleoprotein L (Fragment) O S=Hom o sapiens GN=HNRNPL PE=1 SV=1                        |
|               | 179        | 831 sp P14866 H      | 86.57  | 5            | 5            | 1.80E+06    | 3         | 3       | 5            | 5             | 64133                                                                            | Heterogeneous nuclear ribonucleoprotein L O S=Hom o sapiens GN=HNRNPL PE=1 SV=2                                   |
|               | 271        | 296 sp Q 86Y23 H     | 86.52  | 1            | 1            | 1.32E+05    | 2         | 2       | 2            | Pyro-glutro   | 282389                                                                           | Homerin O S=Hom o sapiens GN=HRNR PE=1 SV=2                                                                       |
|               | 268        | 3004 G 3XAC 6 G 3X   | 86.06  | 6            | 6            | 4.72E+05    | 2         | 2       | 2            | 2             | 48024                                                                            | RNA-binding protein 39 O S=Hom o sapiens GN=RBM39 PE=1 SV=1                                                       |
|               | 268        | 3005 sp Q 14498 R    | 86.06  | 5            | 5            | 4.72E+05    | 2         | 2       | 2            | 2             | 59380                                                                            | RNA-binding protein 39 O S=Hom o sapiens GN=RBM39 PE=1 SV=2                                                       |
|               | 229        | 3008 B3KM 87 B3K     | 85.17  | 5            | 5            | 1.06E+06    | 3         | 3       | 4            | Deamidation   | 56736                                                                            | Matrin-3 O S=Hom o sapiens GN=MATR3 PE=1 SV=1                                                                     |
|               | 229        | 2918 G 6REM 6 D 6F   | 85.17  | 3            | 3            | 1.06E+06    | 3         | 3       | 4            | Deamidation   | 88359                                                                            | Matrin-3 O S=Hom o sapiens GN=MATR3 PE=1 SV=1                                                                     |
|               | 229        | 2907 sp P43243 M     | 85.17  | 3            | 3            | 1.06E+06    | 3         | 3       | 4            | Deamidation   | 94623                                                                            | Matrin-3 O S=Hom o sapiens GN=MATR3 PE=1 SV=2                                                                     |
|               | 229        | 2906 A0A0R4 J2 E8    | 85.17  | 3            | 3            | 1.06E+06    | 3         | 3       | 4            | Deamidation   | 94623                                                                            | Matrin-3 O S=Hom o sapiens GN=MATR3 PE=1 SV=1                                                                     |
|               | 229        | 2908 A8M XP9 A8M     | 85.17  | 3            | 3            | 1.06E+06    | 3         | 3       | 4            | Deamidation   | 99967                                                                            | Matrin-3 O S=Hom o sapiens GN=MATR3 PE=1 SV=1                                                                     |
|               | 276        | 3402 sp Q 01085 T    | 78.55  | 5            | 5            | 9.82E+05    | 2         | 2       | 4            | 4             | 41591                                                                            | Nucleolin TAR O S=Hom o sapiens GN=TAL1 PE=1 SV=1                                                                 |
|               | 184        | 533 sp Q 01081 U     | 77.96  | 10           | 10           | 2.34E+05    | 2         | 2       | 3            | Acetylation ( | 27872                                                                            | Splicing factor U2AF 35 kDa subunit O S=Hom o sapiens GN=U2AF1 PE=1 SV=3                                          |
|               | 184        | 532 sp P0DN 76 U     | 77.96  | 10           | 10           | 2.34E+05    | 2         | 2       | 3            | Acetylation ( | 27872                                                                            | Splicing factor U2AF 35 kDa subunit-like protein O S=Hom o sapiens GN=U2AF1L5 PE=1 SV=1                           |
|               | 278        | 341 Q 2L6G 8 Q 2L    | 75.82  | 5            | 5            | 9.75E+05    | 2         | 2       | 4            | 4             | 51539                                                                            | CDSN O S=Hom o sapiens GN=CDSN PE=1 SV=1                                                                          |
|               | 278        | 340 sp Q 15517 C     | 75.82  | 5            | 5            | 9.75E+05    | 2         | 2       | 4            | 4             | 51522                                                                            | Comedusomycin O S=Hom o sapiens GN=CDSN PE=1 SV=3                                                                 |
|               | 278        | 339 G 8JL 2 G 8JL    | 75.82  | 5            | 5            | 9.75E+05    | 2         | 2       | 4            | 4             | 51607                                                                            | CDSN O S=Hom o sapiens GN=CDSN PE=1 SV=1                                                                          |
|               | 265        | 2981 sp Q 8N 3C0 J   | 72.01  | 1            | 1            | 2.01E+05    | 2         | 2       | 2            | 2             | 251458                                                                           | Activating signal integrator 1 complex subunit 3 O S=Hom o sapiens GN=ASCC3 PE=1 SV=3                             |
|               | 333        | 43349 sp Q 9BPW 8 J  | 64.94  | 8            | 8            | 7.52E+05    | 3         | 2       | 3            | 3             | 33310                                                                            | Protein Snap homolog 1 O S=Hom o sapiens GN=PSNAP1 PE=1 SV=1                                                      |
|               | 264        | 9079 H 7BY1 H 7B     | 63.99  | 12           | 12           | 1.02E+06    | 4         | 4       | 4            | 4             | 28747                                                                            | Tropomyosin 1 (alpha) isoform CRA m O S=Hom o sapiens GN=TPM1 PE=1 SV=1                                           |
|               | 336        | 23726 sp Q 6P H8 S Y | 63.59  | 3            | 3            | 9.75E+05    | 2         | 2       | 2            | 2             | 73563                                                                            | Aspartate--tRNA ligase mitochondrial O S=Hom o sapiens GN=DARS2 PE=1 SV=1                                         |
|               | 456        | 3111 J3Q T54 J3Q T   | 62.78  | 9            | 9            | 4.03E+05    | 2         | 2       | 2            | 2             | 22620                                                                            | Cleavage and polyadenylation-specificity factor subunit 7 (Fragment) O S=Hom o sapiens GN=CPSF7 PE=1 SV=8         |
|               | 456        | 3112 F5H 6M O F5H    | 62.78  | 9            | 9            | 4.03E+05    | 2         | 2       | 2            | 2             | 24387                                                                            | Cleavage and polyadenylation-specificity factor subunit 7 (Fragment) O S=Hom o sapiens GN=CPSF7 PE=1 SV=1         |
|               | 456        | 3116 F5H 047 F5H     | 62.78  | 7            | 7            | 4.03E+05    | 2         | 2       | 2            | 2             | 31506                                                                            | Cleavage and polyadenylation-specificity factor subunit 7 (Fragment) O S=Hom o sapiens GN=CPSF7 PE=1 SV=1         |
|               | 456        | 2938 F5H 669 F5H     | 62.78  | 5            | 5            | 4.03E+05    | 2         | 2       | 2            | 2             | 41266                                                                            | Cleavage and polyadenylation-specificity factor subunit 7 (Fragment) O S=Hom o sapiens GN=CPSF7 PE=1 SV=1         |
|               | 456        | 2939 sp Q 8N 684 C   | 62.78  | 4            | 4            | 4.03E+05    | 2         | 2       | 2            | 2             | 52050                                                                            | Cleavage and polyadenylation specificity factor subunit 7 O S=Hom o sapiens GN=CPSF7 PE=1 SV=1                    |
|               | 206        | 419 X6RD A4 X6R      | 60.45  | 14           | 14           | 6.40E+05    | 3         | 2       | 5            | 5             | 27274                                                                            | Paraspeckle component 1 (Fragment) O S=Hom o sapiens GN=PSPC1 PE=1 SV=1                                           |
|               | 206        | 422 sp Q 8W XF1 J    | 60.45  | 7            | 7            | 6.40E+05    | 3         | 2       | 5            | 5             | 58744                                                                            | Paraspeckle component 1 O S=Hom o sapiens GN=PSPC1 PE=1 SV=1                                                      |
|               | 455        | 43354 sp Q 9Y3B7 R   | 57.8   | 12           | 12           | 1.72E+05    | 2         | 2       | 2            | 2             | 20683                                                                            | 39S ribosomal protein L11 mitochondrial O S=Hom o sapiens GN=M RPL11 PE=1 SV=1                                    |
|               | 208        | 43350 sp Q 9Y2A7 N   | 55.81  | 2            | 2            | 3.25E+05    | 2         | 2       | 2            | 2             | 128790                                                                           | Nck-associated protein 1 O S=Hom o sapiens GN=NCKAP1 PE=1 SV=1                                                    |
|               | 341        | 561 H 0YFC 6 H 0Y    | 54.22  | 21           | 21           | 2.62E+05    | 2         | 2       | 3            | 3             | 11687                                                                            | GTP-binding nuclear protein Ran (Fragment) O S=Hom o sapiens GN=RAN PE=1 SV=1                                     |
|               | 341        | 319 F5H 018 F5H      | 54.22  | 11           | 11           | 2.62E+05    | 2         | 2       | 3            | 3             | 22436                                                                            | GTP-binding nuclear protein Ran (Fragment) O S=Hom o sapiens GN=RAN PE=1 SV=8                                     |
|               | 341        | 226 sp P62826 R      | 54.22  | 10           | 10           | 2.62E+05    | 2         | 2       | 3            | 3             | 24423                                                                            | GTP-binding nuclear protein Ran O S=Hom o sapiens GN=RAN PE=1 SV=3                                                |
|               | 341        | 227 B5M D F5 B5M     | 54.22  | 9            | 9            | 2.62E+05    | 2         | 2       | 3            | 3             | 26224                                                                            | GTP-binding nuclear protein Ran O S=Hom o sapiens GN=RAN PE=1 SV=1                                                |
|               | 341        | 320 J3KQ E5 J3KQ     | 54.22  | 9            | 9            | 2.62E+05    | 2         | 2       | 3            | 3             | 26816                                                                            | GTP-binding nuclear protein Ran (Fragment) O S=Hom o sapiens GN=RAN PE=1 SV=1                                     |
|               | 230        | 43351 sp P42285 S F  | 51.98  | 2            | 2            | 4.89E+05    | 2         | 2       | 2            | 2             | 117805                                                                           | Superkiller viral-like activity 2-like 2 O S=Hom o sapiens GN=SKM2L2 PE=1 SV=3                                    |
|               | 457        | 2988 sp Q 02878 R    | 51.9   | 5            | 5            | 3.72E+05    | 2         | 2       | 2            | 2             | 32728                                                                            | 60S ribosomal protein L6 O S=Hom o sapiens GN=RPL6 PE=1 SV=3                                                      |

Figure S1. qRT-PCR validation of four differentially expressed lncRNAs. (A) Comparison of fold change ( $\log_2(P_1/P_2)$ ) of lncRNAs between microarray and qRT-PCR results ( $P_1$ : primary tumor;  $P_2$ : spinal metastasis). (B) Relative expression levels of lncRNAs in tissues of patients with primary lung adenocarcinoma and lung adenocarcinoma spinal metastasis.

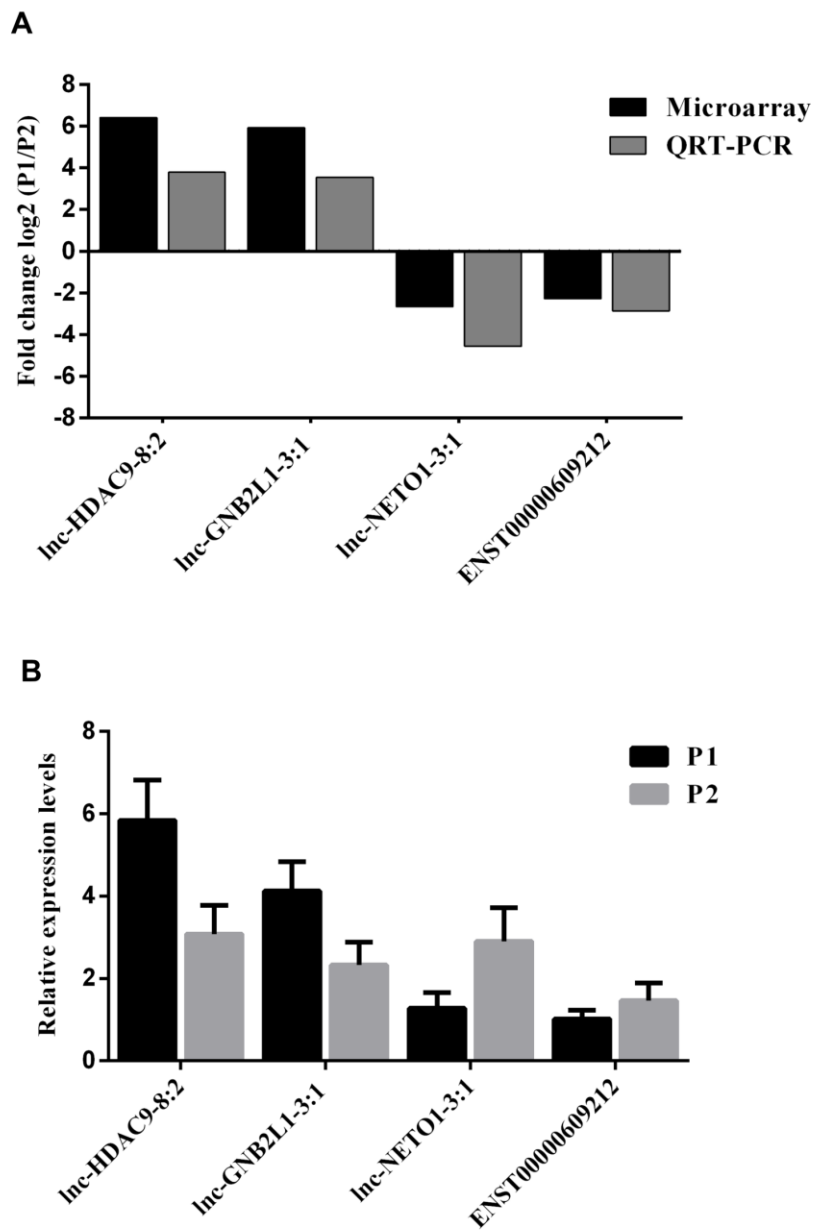

Figure S2. RNA pull-down assay for LINC00852 targeting S100A9. (A) Protein lysates obtained by RNA pull-down assays for mass spectrometry were analyzed by SDS-PAGE following silver staining. (B) Ion peak graph of S100A9.

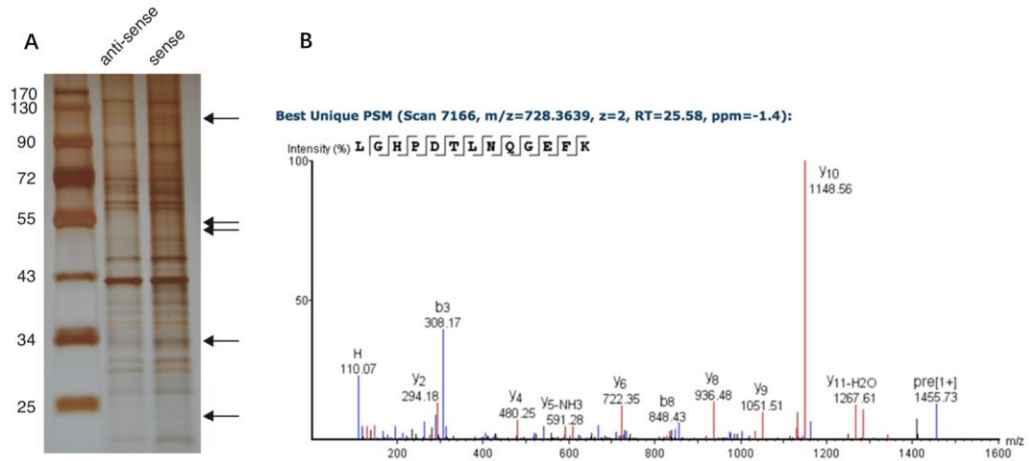

Figure S3. PET scan showing metastasis of other organs 6–8 weeks after ventricular injection in four groups of mice.

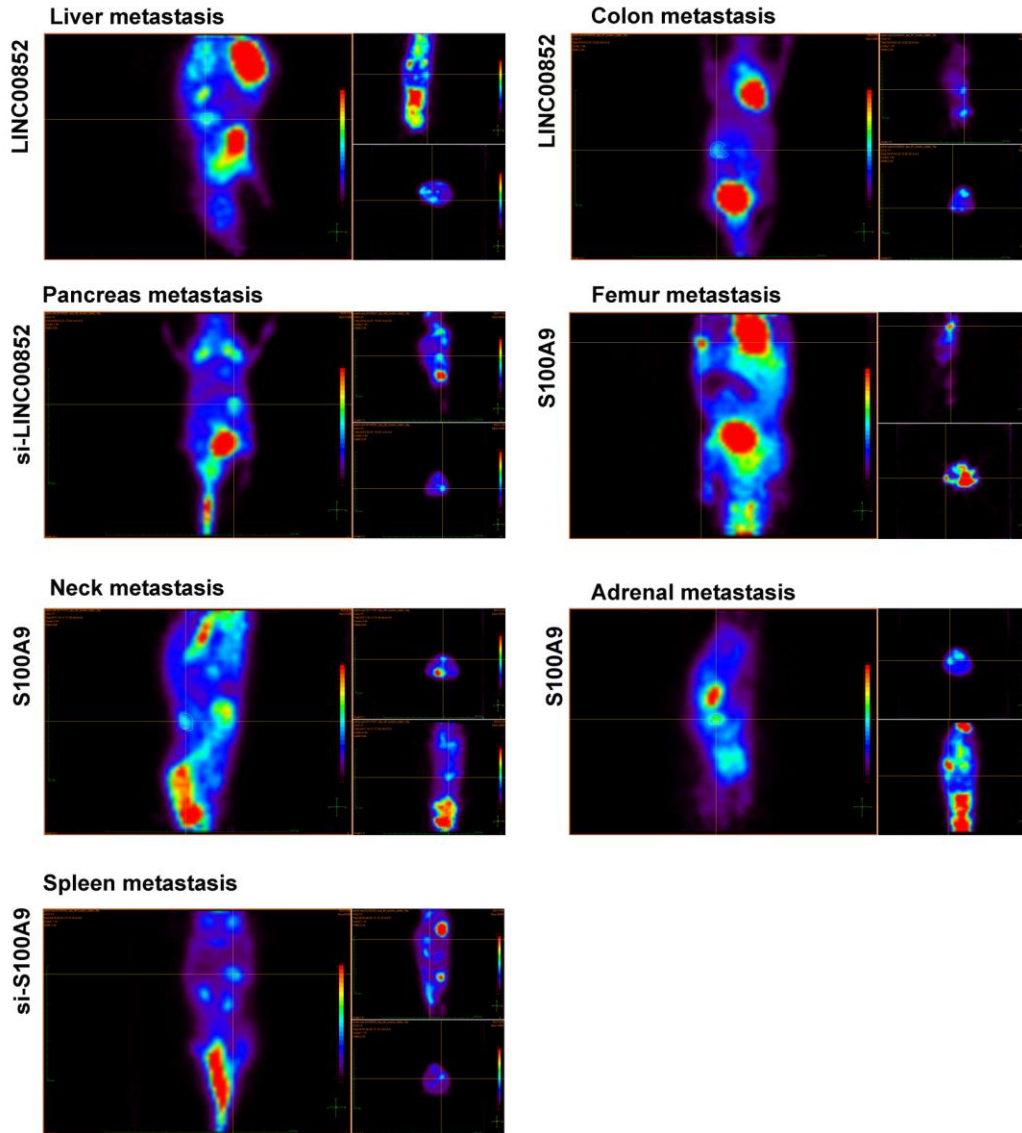

Supplement: jcav09p4139s1.pdf [file jcav09p4139s1.pdf]
